# Supplementary material for: Bayesian Evaluation of Temporal Signal in Measurably Evolving Populations
Source: bioRxiv or medRxiv preprint supplement (doi:10.1101/810697), 2020-06-28
Supplement: Supplementary file [file media-1.pdf]

Log Bayes factors relative to best model

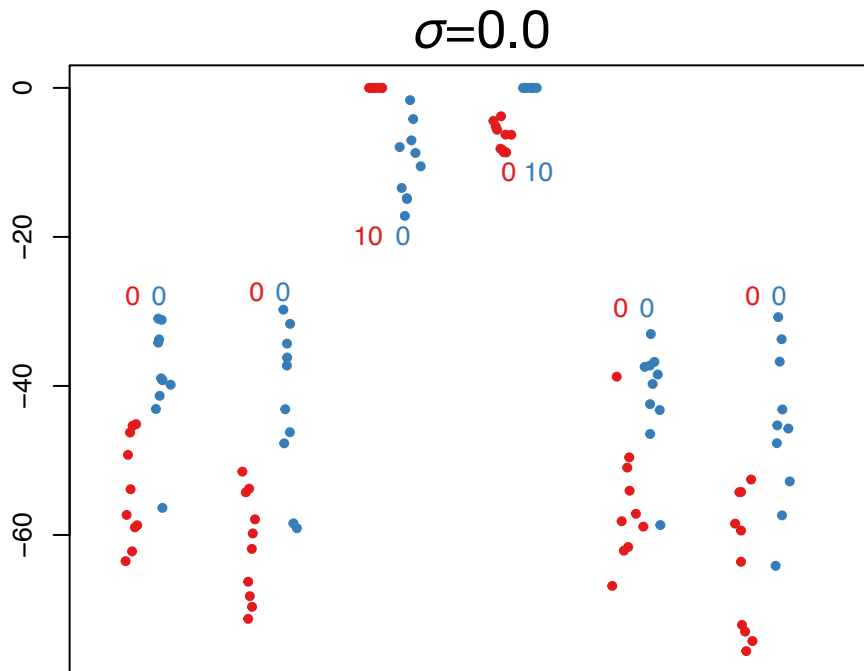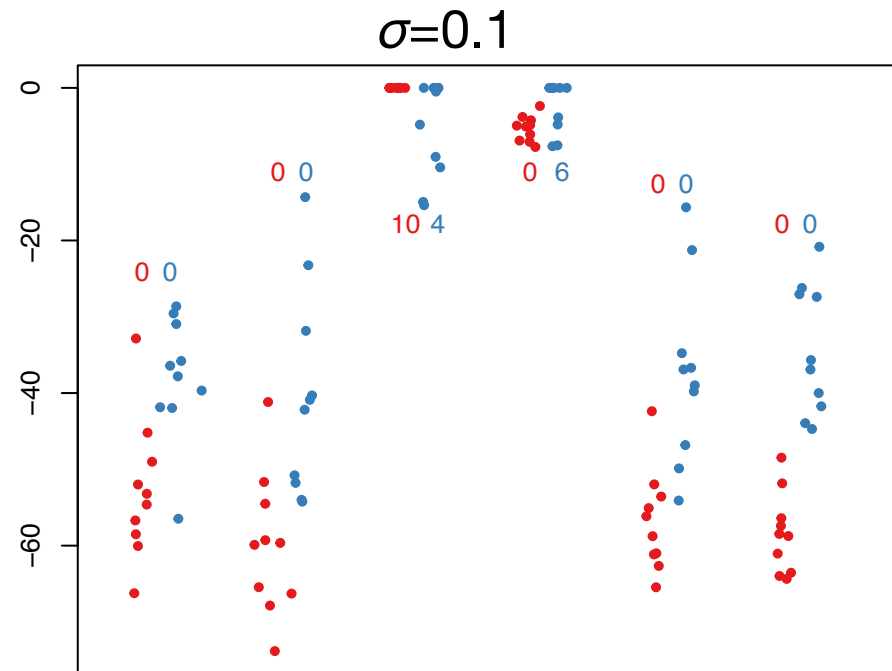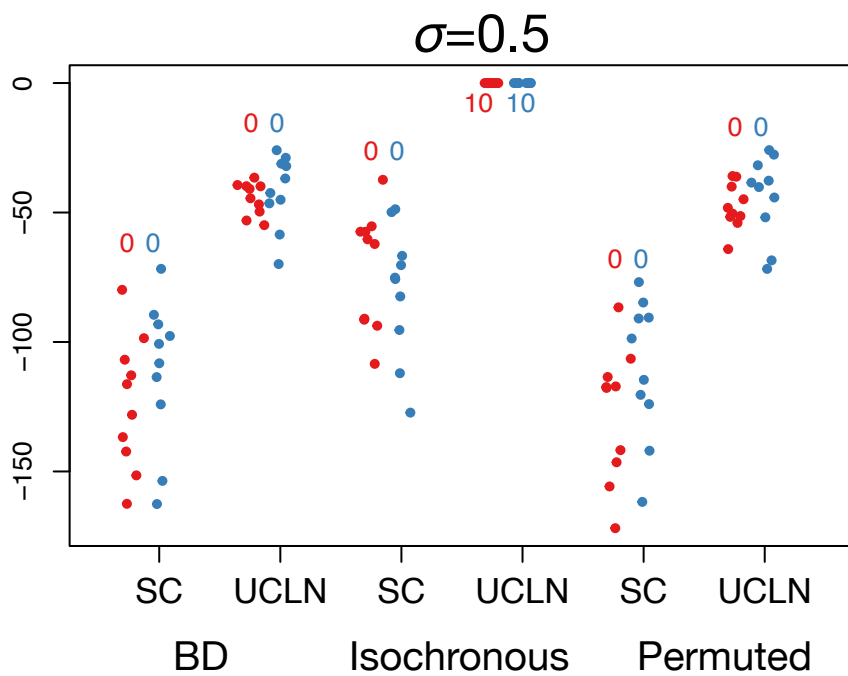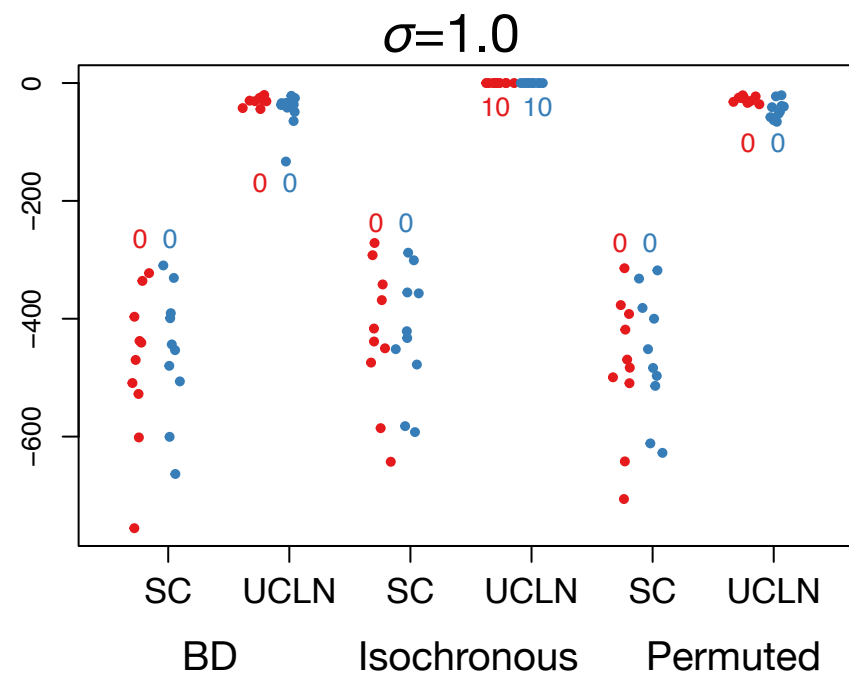

Analysis settings

Log Bayes factors relative to best model

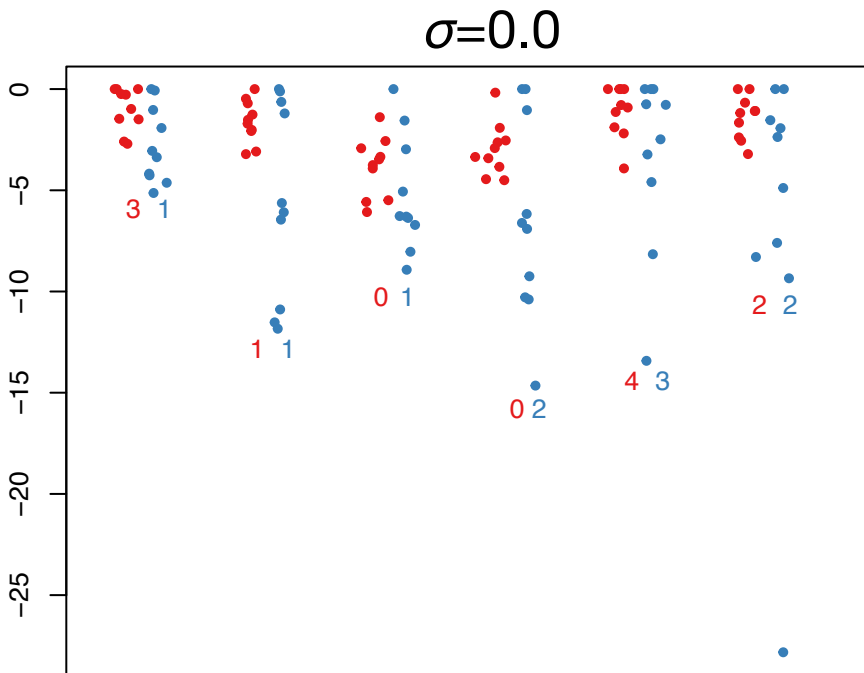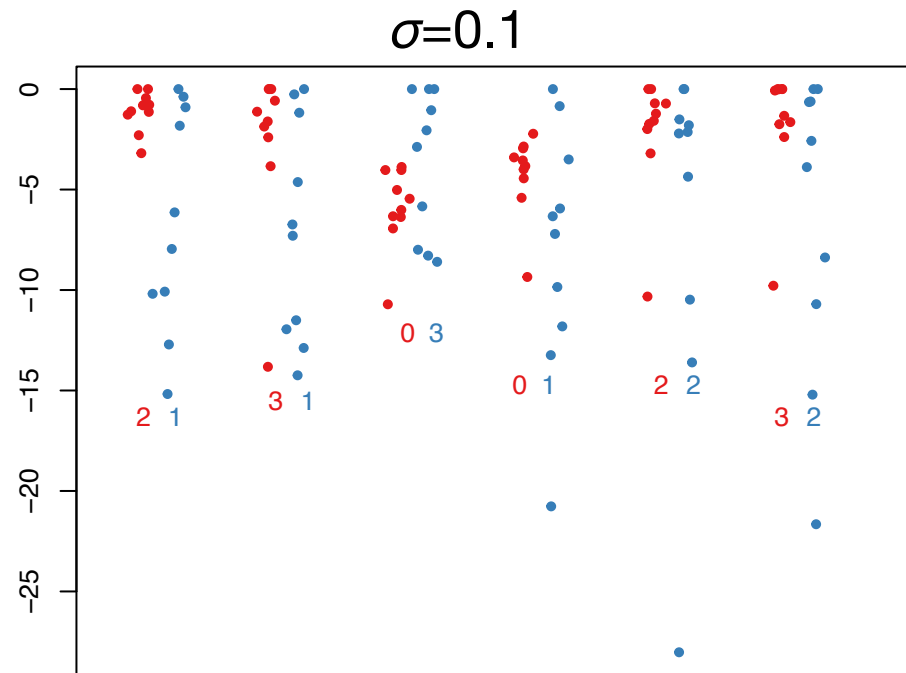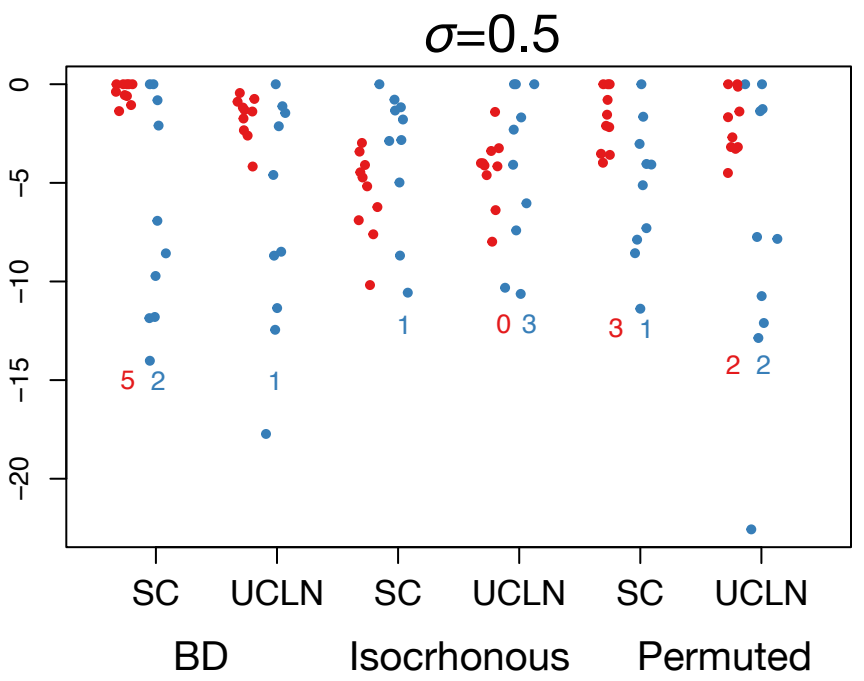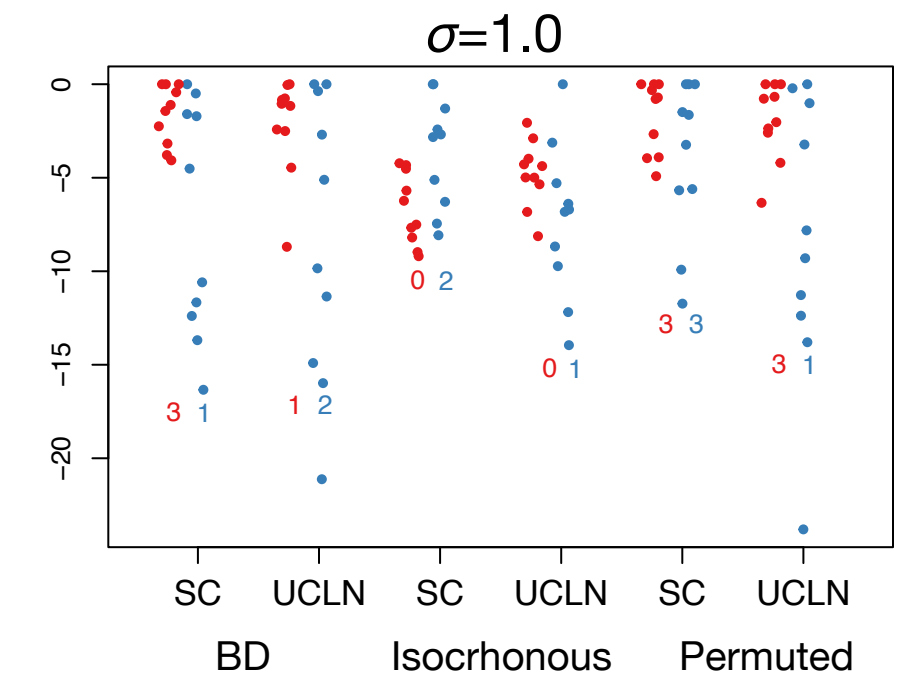

Analysis settings

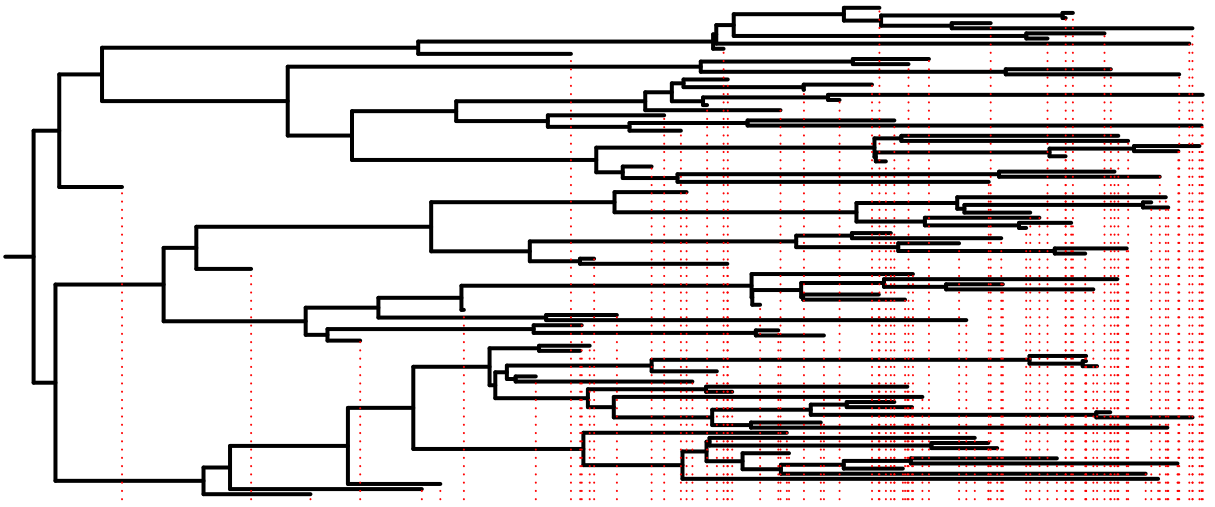

Birth death tree with constant sampling  
 $\lambda=1.5, \mu=0.5, \psi=0.5, \text{origin}=5$

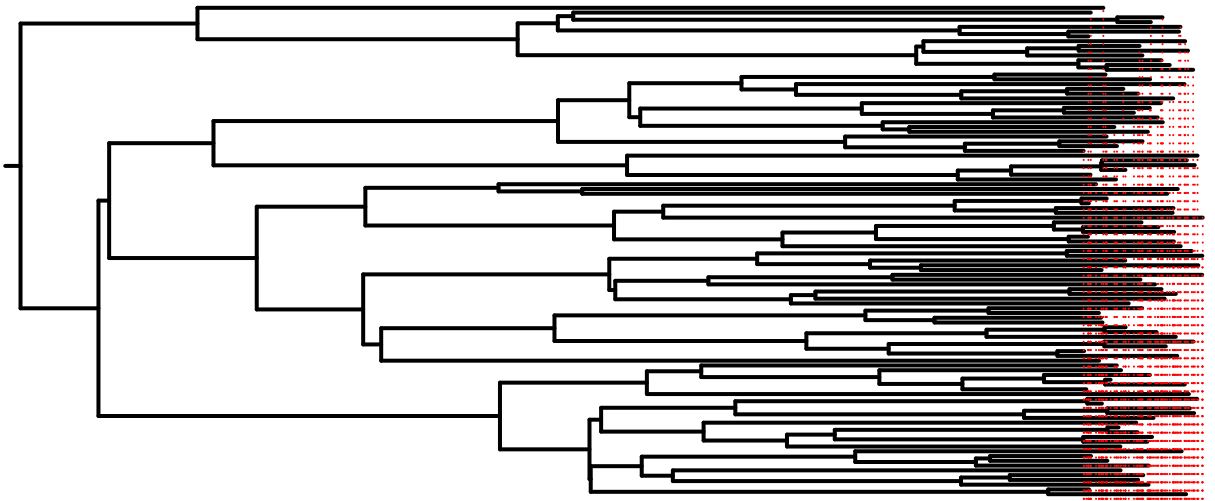

Birth death tree with variable sampling  
 $\lambda=1.5, \mu_0=1.0, \psi_0=0.0, \mu_1=0.1, \psi_1=0.9, \text{origin}=5, \text{sampling time}=4.5$

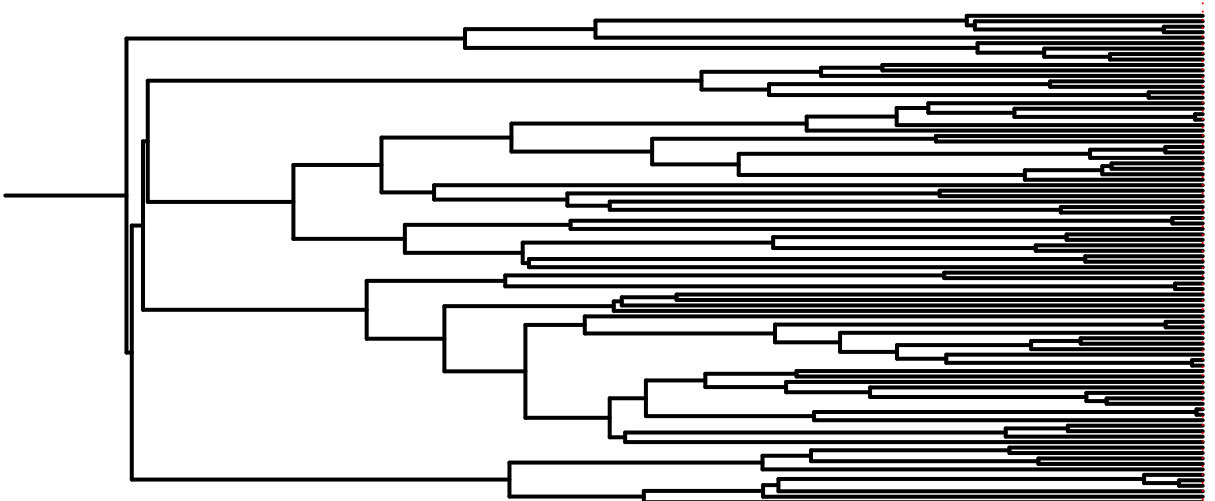

Birth death tree with a single sampling time point  
 $\lambda=1.5, \mu=1, \psi=0, \rho=0.5, \text{origin}=5$
